# Supplementary material
Source: publisher site journal article supplement (https://www.dovepress.com/get_supplementary_file.php?f=256381.docx)
Supplement: Supplementary file 1 [file get_supplementary_file.php]

**Supplementary Table 1. Patient demographics and clinical characteristics before and after propensity score matching**

| **Patient characteristics** | **Before PSM** | | | |  | **After PSM** | | | |
| --- | --- | --- | --- | --- | --- | --- | --- | --- | --- |
| Total  (n= 328) | Timely initiation  (n= 234) | Delayed initiation  (n= 94) | *P*-value | Total  (n= 184) | Timely initiation  (n= 92) | Delayed initiation  (n= 92) | *P*-value |
| **Demographics** | | | | | | | | | |
| Age (years)# |  |  |  | 0.495# |  |  |  |  | 0.847# |
| n | 328 | 234 | 94 |  |  | 184 | 92 | 92 |  |
| Mean ± SD | 67.4 ± 10.4 | 67.8 ± 10.1 | 66.5 ± 11.0 |  |  | 66.9 ± 11.3 | 67.1 ± 11.7 | 66.8 ± 10.9 |  |
| Median  (IQR) | 68.0  (61.0, 75.0) | 67.0  (61.0, 75.0) | 68.0  (59.0, 75.0) |  |  | 68.0  (59.0, 74.5) | 68.5  (59.0, 74.0) | 68.0  (59.0, 75.0) |  |
| Age group (years) |  |  |  | 0.550 |  |  |  |  | 1.000 |
| <65 | 114 (34.76%) | 79 (33.76%) | 35 (37.23%) |  |  | 66 (35.87%) | 33 (35.87%) | 33 (35.87%) |  |
| ≥65 | 214 (65.24%) | 155 (66.24%) | 59 (62.77%) |  |  | 118 (64.13%) | 59 (64.13%) | 59 (64.13%) |  |
| Sex |  |  |  | 0.970 |  |  |  |  | 0.767 |
| Male | 153 (46.65%) | 109 (46.58%) | 44 (46.81%) |  |  | 84 (45.65%) | 41 (44.57%) | 43 (46.74%) |  |
| Female | 175 (53.35%) | 125 (53.42%) | 50 (53.19%) |  |  | 100 (54.35%) | 51 (55.43%) | 49 (53.26%) |  |
| Last OAD regimen |  |  |  | 0.611 |  |  |  |  | 0.951 |
| 1 OAD | 53 (16.16%) | 37 (15.81%) | 16 (17.02%) |  |  | 31 (16.85%) | 15 (16.30%) | 16 (17.39%) |  |
| 2 OADs | 111 (33.84%) | 76 (32.48%) | 35 (37.23%) |  |  | 70 (38.04%) | 36 (39.13%) | 34 (36.96%) |  |
| ≥3 OADs | 164 (50.00%) | 121 (51.71%) | 43 (45.74%) |  |  | 83 (45.11%) | 41 (44.57%) | 42 (45.65%) |  |
| Insurance status |  |  |  | 1.000 |  |  |  |  | 0.712 |
| With | 266 (96.38%) | 184 (96.34%) | 82 (96.47%) |  |  | 153 (95.63%) | 73 (94.81%) | 80 (96.39%) |  |
| Without | 10 (3.62%) | 7 (3.66%) | 3 (3.53%) |  |  | 7 (4.38%) | 4 (5.19%) | 3 (3.61%) |  |
| Missing | 52 | 43 | 9 |  |  | 24 | 15 | 9 |  |
| Therapy department at insulin initiation |  |  |  | 0.151 |  |  |  |  | 0.180 |
| Endocrinology | 182 (55.49%) | 124 (52.99%) | 58 (61.70%) |  |  | 105 (57.07%) | 48 (52.17%) | 57 (61.96%) |  |
| Others | 146 (44.51%) | 110 (47.01%) | 36 (38.30%) |  |  | 79 (42.93%) | 44 (47.83%) | 35 (38.04%) |  |
| Hospital level at insulin initiation |  |  |  | 0.036 |  |  |  |  | 0.155 |
| Secondary | 45 (13.72%) | 38 (16.24%) | 7 (7.45%) |  |  | 20 (10.87%) | 13 (14.13%) | 7 (7.61%) |  |
| Tertiary | 283 (86.28%) | 196 (83.76%) | 87 (92.55%) |  |  | 164 (89.13%) | 79 (85.87%) | 85 (92.39%) |  |
| **Clinical characteristics** | |  |  |  |  |  |  |  |  |
| Baseline HbA1c level (%)# |  |  |  | <0.001*# |  |  |  |  | 0.461# |
| n | 328 | 234 | 94 |  |  | 184 | 92 | 92 |  |
| Mean ± SD | 9.17 ± 1.78 | 9.42 ± 1.83 | 8.55 ± 1.49 |  |  | 8.64 ± 1.58 | 8.72 ± 1.66 | 8.57 ± 1.50 |  |
| Median  (IQR) | 8.70  (7.80, 10.45) | 9.10  (7.90, 10.60) | 8.20  (7.50, 9.10) |  |  | 8.20  (7.60, 9.15) | 8.15  (7.65, 9.30) | 8.25  (7.50, 9.10) |  |
| Baseline HbA1c group (%) |  |  |  | 0.001*** |  |  |  |  | 0.984 |
| 7 ≤ and <8 | 105 (32.01%) | 64 (27.35%) | 41 (43.62%) |  |  | 77 (41.85%) | 38 (41.30%) | 39 (42.39%) |  |
| 8 ≤ and <9 | 75 (22.87%) | 49 (20.94%) | 26 (27.66%) |  |  | 53 (28.80%) | 27 (29.35%) | 26 (28.26%) |  |
| ≥9 | 148 (45.12%) | 121 (51.71%) | 27 (28.72%) |  |  | 54 (29.35%) | 27 (29.35%) | 27 (29.35%) |  |
| Comorbidities |  |  |  |  |  |  |  |  |  |
| Hypertension | 254 (77.44%) | 172 (73.50%) | 82 (87.23%) | 0.007*** |  | 160 (86.96%) | 80 (86.96%) | 80 (86.96%) | 1.000 |
| Dyslipidemia | 228 (69.51%) | 162 (69.23%) | 66 (70.21%) | 0.861 |  | 123 (66.85%) | 58 (63.04%) | 65 (70.65%) | 0.273 |
| Coronary artery disease | 87 (26.52%) | 53 (22.65%) | 34 (36.17%) | 0.012*** |  | 64 (34.78%) | 32 (34.78%) | 32 (34.78%) | 1.000 |
| Stroke | 53 (16.16%) | 33 (14.10%) | 20 (21.28%) | 0.111 |  | 42 (22.83%) | 22 (23.91%) | 20 (21.74%) | 0.725 |
| Hyperuricemia | 3 (0.91%) | 2 (0.85%) | 1 (1.06%) | 1.000 |  | 3 (1.63%) | 2 (2.17%) | 1 (1.09%) | 1.000 |
| Atherosclerosis | 16 (4.88%) | 13 (5.56%) | 3 (3.19%) | 0.571 |  | 12 (6.52%) | 9 (9.78%) | 3 (3.26%) | 0.073 |
| Complications |  |  |  |  |  |  |  |  |  |
| Diabetic foot† | 2 (0.61%) | 2 (0.85%) | 0 | 1.000 |  |  |  |  |  |
| Neuropathy | 6 (1.83%) | 4 (1.71%) | 2 (2.13%) | 1.000 |  | 4 (2.17%) | 2 (2.17%) | 2 (2.17%) | 1.000 |

† No records after PSM. IQD= Inter Quartile Range, OAD= Oral anti-diabetic drug, PSM= Propensity Score Matching, * P <0.05, #age and baseline HbA1c level were non-normally distributed, so Wilcoxon rank sum test was performed to compare the difference between groups

**Supplementary Table 2. Linear regression of the impact of delay in insulin initiation on follow-up HbA1c level**

|  | **Univariate** | | |  | **Multivariate** | | |
| --- | --- | --- | --- | --- | --- | --- | --- |
| **Variable** | B (95% CI) | SE | *P*-value |  | B (95% CI) | SE | *P*-value |
| Insulin initiation |  |  |  |  |  |  |  |
| Timely initiation |  |  |  |  |  |  |  |
| Delayed initiation | 0.0004 (-0.0058, 0.0065) | 0.0031 | 0.910 |  | 0.0041 (-0.0021, 0.0102) | 0.0031 | 0.193 |
| Age group (years) |  |  |  |  |  |  |  |
| < 65 |  |  |  |  |  |  |  |
| ≥ 65 | 0.0024 (-0.0033, 0.0082) | 0.0029 | 0.406 |  | 0.0038 (-0.0021, 0.0097) | 0.0030 | 0.205 |
| Sex |  |  |  |  |  |  |  |
| Male |  |  |  |  |  |  |  |
| Female | -0.0011 (-0.0067, 0.0044) | 0.0028 | 0.683 |  | 0.0012 (-0.0044, 0.0067) | 0.0028 | 0.676 |
| Last OADs regimen |  |  |  |  |  |  |  |
| 1 OAD |  |  |  |  |  |  |  |
| 2 OADs | -0.0065 (-0.0123, -0.0007) | 0.0029 | 0.029*** |  | 0.0018 (-0.0063, 0.0099) | 0.0041 | 0.657 |
| ≥ 3 OADs | 0.0108 (0.0054, 0.0162) | 0.0027 | <0.001*** |  | 0.0122 (0.0045, 0.0198) | 0.0039 | 0.002*** |
| Baseline HbA1c group (%) |  |  |  |  |  |  |  |
| 7 ≤ and < 8 |  |  |  |  |  |  |  |
| 8 ≤ and < 9 | -0.0054 (-0.0120, 0.0011) | 0.0033 | 0.105 |  | 0.0007 (-0.0067, 0.0081) | 0.0037 | 0.854 |
| ≥ 9 | 0.0078 (0.0023, 0.0133) | 0.0028 | 0.005*** |  | 0.0078 (0.0015, 0.0142) | 0.0032 | 0.016*** |
| Hospital level at insulin initiation |  |  |  |  |  |  |  |
| Secondary |  |  |  |  |  |  |  |
| Tertiary | 0.0046 (-0.0034, 0.0126) | 0.0041 | 0.258 |  | 0.0061 (-0.0019, 0.0141) | 0.0041 | 0.136 |
| Hypertension |  |  |  |  |  |  |  |
| No |  |  |  |  |  |  |  |
| Yes | -0.0049 (-0.0115, 0.0017) | 0.0033 | 0.143 |  | -0.0046 (-0.0114, 0.0021) | 0.0034 | 0.178 |
| Dyslipidemia |  |  |  |  |  |  |  |
| No |  |  |  |  |  |  |  |
| Yes | -0.0038 (-0.0098, 0.0022) | 0.0030 | 0.214 |  | -0.0067 (-0.0127, -0.0007) | 0.0031 | 0.030*** |
| Coronary heart disease |  |  |  |  |  |  |  |
| No |  |  |  |  |  |  |  |
| Yes | -0.0071 (-0.0133, -0.0009) | 0.0032 | 0.026*** |  | -0.0076 (-0.0141, -0.0011) | 0.0033 | 0.022*** |

HbA1c= Glycated hemoglobin, OAD= Oral anti-diabetic drug, SE= Standard error, CI= Confidence interval, * *P* <0.05

**Supplementary Table 3. Logistic regression of the impact of delay in insulin initiation on follow-up HbA1c target attainment**

|  | **Univariate** | | |  | **Multivariate** | | |
| --- | --- | --- | --- | --- | --- | --- | --- |
| **Variable** | n | ORCrude (95% CI) | *P*-value |  | n | ORAdjusted (95% CI) | *P*-value |
| Insulin initiation |  |  |  |  |  |  |  |
| Delayed initiation | 94 | 1.00 |  |  | 94 | 1.00 |  |
| Timely initiation | 234 | 1.74 (0.93-3.25) | 0.085 |  | 234 | 2.52 (1.26-5.04) | 0.009*** |
| Age group (year) |  |  |  |  |  |  |  |
| ≥ 65 | 214 | 1.00 |  |  | 214 | 1.00 |  |
| < 65 | 114 | 1.22 (0.71-2.10) | 0.464 |  | 114 | 1.73 (0.93-3.20) | 0.081 |
| Sex |  |  |  |  |  |  |  |
| Female | 175 | 1.00 |  |  | 175 | 1.00 |  |
| Male | 153 | 1.00 (0.59-1.68) | 0.989 |  | 153 | 1.2 3(0.69-2.19) | 0.484 |
| Last OADs regimen class |  |  |  |  |  |  |  |
| ≥ 3 OADs | 164 | 1.00 |  |  | 164 | 1.00 |  |
| 1 OAD | 53 | 4.02 (1.99-8.14) | <0.001*** |  | 53 | 4.02 (1.93-8.38) | <0.001*** |
| 2 OADs | 111 | 2.17 (1.18-4.00) | 0.013 |  | 111 | 2.33 (1.23-4.43) | 0.009*** |
| Baseline HbA1c group (%) |  |  |  |  |  |  |  |
| ≥ 9 | 148 | 1.00 |  |  | 148 | 1.00 |  |
| 7 ≤ and < 8 | 105 | 1.35 (0.74-2.46) | 0.327 |  | 105 | 1.63 (0.84-3.18) | 0.149 |
| 8 ≤ and < 9 | 75 | 1.30 (0.66-2.53) | 0.447 |  | 75 | 1.22 (0.59-2.53) | 0.592 |
| Hospital level at insulin initiation |  |  |  |  |  |  |  |
| Secondary | 45 | 1.00 |  |  | 45 | 1.00 |  |
| Tertiary | 283 | 0.87 (0.42-1.81) | 0.704 |  | 283 | 1.02 (0.44-2.35) | 0.959 |
| Hypertension |  |  |  |  |  |  |  |
| No | 74 | 1.00 |  |  | 74 | 1.00 |  |
| Yes | 254 | 1.16 (0.61-2.20) | 0.641 |  | 254 | 1.09 (0.54-2.22) | 0.805 |
| Dyslipidemia |  |  |  |  |  |  |  |
| No | 100 | 1.00 |  |  | 100 | 1.00 |  |
| Yes | 228 | 1.02 (0.58-1.80) | 0.941 |  | 228 | 1.28 (0.67-2.41) | 0.454 |
| Coronary heart disease |  |  |  |  |  |  |  |
| No | 241 | 1.00 |  |  | 241 | 1.00 |  |
| Yes | 87 | 2.24 (1.29-3.89) | 0.004*** |  | 87 | 3.08 (1.60-5.92) | <0.001*** |

HbA1c= Glycated hemoglobin, OAD= Oral anti-diabetic drug, OR= Odds ratio, CI= Confidence interval, * P <0.05.

**Supplementary Table 4. Logistic regression of factors influencing delay in insulin initiation**

|  | **Univariate** | | |  | **Multivariate** | | |
| --- | --- | --- | --- | --- | --- | --- | --- |
| **Variable** | n | ORCrude (95% CI) | *P*-value |  | n | ORAdjusted (95% CI) | *P*-value |
| Age group (year) |  |  |  |  |  |  |  |
| ≥ 65 | 539 | 1.00 |  |  | 539 | 1.00 |  |
| < 65 | 401 | 1.04 (0.78-1.38) | 0.807 |  | 400 | 1.33 (0.96-1.84) | 0.091 |
| Sex |  |  |  |  |  |  |  |
| Female | 484 | 1.00 |  |  | 484 | 1.00 |  |
| Male | 456 | 1.07 (0.81-1.43) | 0.622 |  | 455 | 1.22 (0.89-1.65) | 0.212 |
| Last OADs regimen |  |  |  |  |  |  |  |
| ≥ 3 OADs | 457 | 1.00 |  |  | 456 | 1.00 |  |
| 1 OAD | 161 | 1.52 (1.03-2.26) | 0.036*** |  | 161 | 1.59 (1.04-2.41) | 0.030*** |
| 2 OADs | 322 | 1.44 (1.04-1.98) | 0.026*** |  | 322 | 1.44 (1.03-2.03) | 0.034*** |
| Baseline HbA1c group (%) |  |  |  |  |  |  |  |
| ≥ 9 | 461 | 1.00 |  |  | 460 | 1.00 |  |
| 7 ≤ and < 8 | 278 | 3.46 (2.46-4.87) | <0.001*** |  | 278 | 3.09 (2.16-4.41) | <0.001*** |
| 8 ≤ and < 9 | 201 | 2.51 (1.72-3.67) | <0.001*** |  | 201 | 2.47 (1.66-3.67) | <0.001*** |
| Therapy department at insulin initiation |  |  |  |  |  |  |  |
| Others | 467 | 1.00 |  |  | 467 | 1.00 |  |
| Endocrinology | 472 | 1.22 (0.92-1.62) | 0.175 |  | 472 | 1.28 (0.94-1.73) | 0.115 |
| Hospital level at insulin initiation |  |  |  |  |  |  |  |
| Secondary | 226 | 1.00 |  |  | 225 | 1.00 |  |
| Tertiary | 714 | 2.16(1.48-3.16) | <0.001*** |  | 714 | 1.95(1.29-2.94) | 0.001*** |
| Hypertension |  |  |  |  |  |  |  |
| No | 313 | 1.00 |  |  | 313 | 1.00 |  |
| Yes | 627 | 2.17 (1.55-3.02) | <0.001*** |  | 626 | 1.69 (1.17-2.45) | 0.005*** |
| Dyslipidemia |  |  |  |  |  |  |  |
| No | 313 | 1.00 |  |  | 312 | 1.00 |  |
| Yes | 627 | 1.18 (0.87-1.61) | 0.286 |  | 627 | 1.29 (0.92-1.80) | 0.138 |
| Coronary heart disease |  |  |  |  |  |  |  |
| No | 735 | 1.00 |  |  | 734 | 1.00 |  |
| Yes | 205 | 1.61 (1.16-2.24) | 0.005*** |  | 205 | 1.60 (1.10-2.34) | 0.015*** |
| Stroke |  |  |  |  |  |  |  |
| No | 815 | 1.00 |  |  | 814 | 1.00 |  |
| Yes | 125 | 1.06 (0.70-1.61) | 0.782 |  | 125 | 0.88 (0.56-1.38) | 0.583 |

HbA1c= Glycated hemoglobin, OAD= Oral anti-diabetic drug, OR= Odds ratio, CI= Confidence interval, * *P* <0.05
